# Supplementary material
Source: publisher figshare collection journal article supplement (https://frontiersin.figshare.com/ndownloader/files/12702500)
Supplement: Supplementary file [file 12702500]

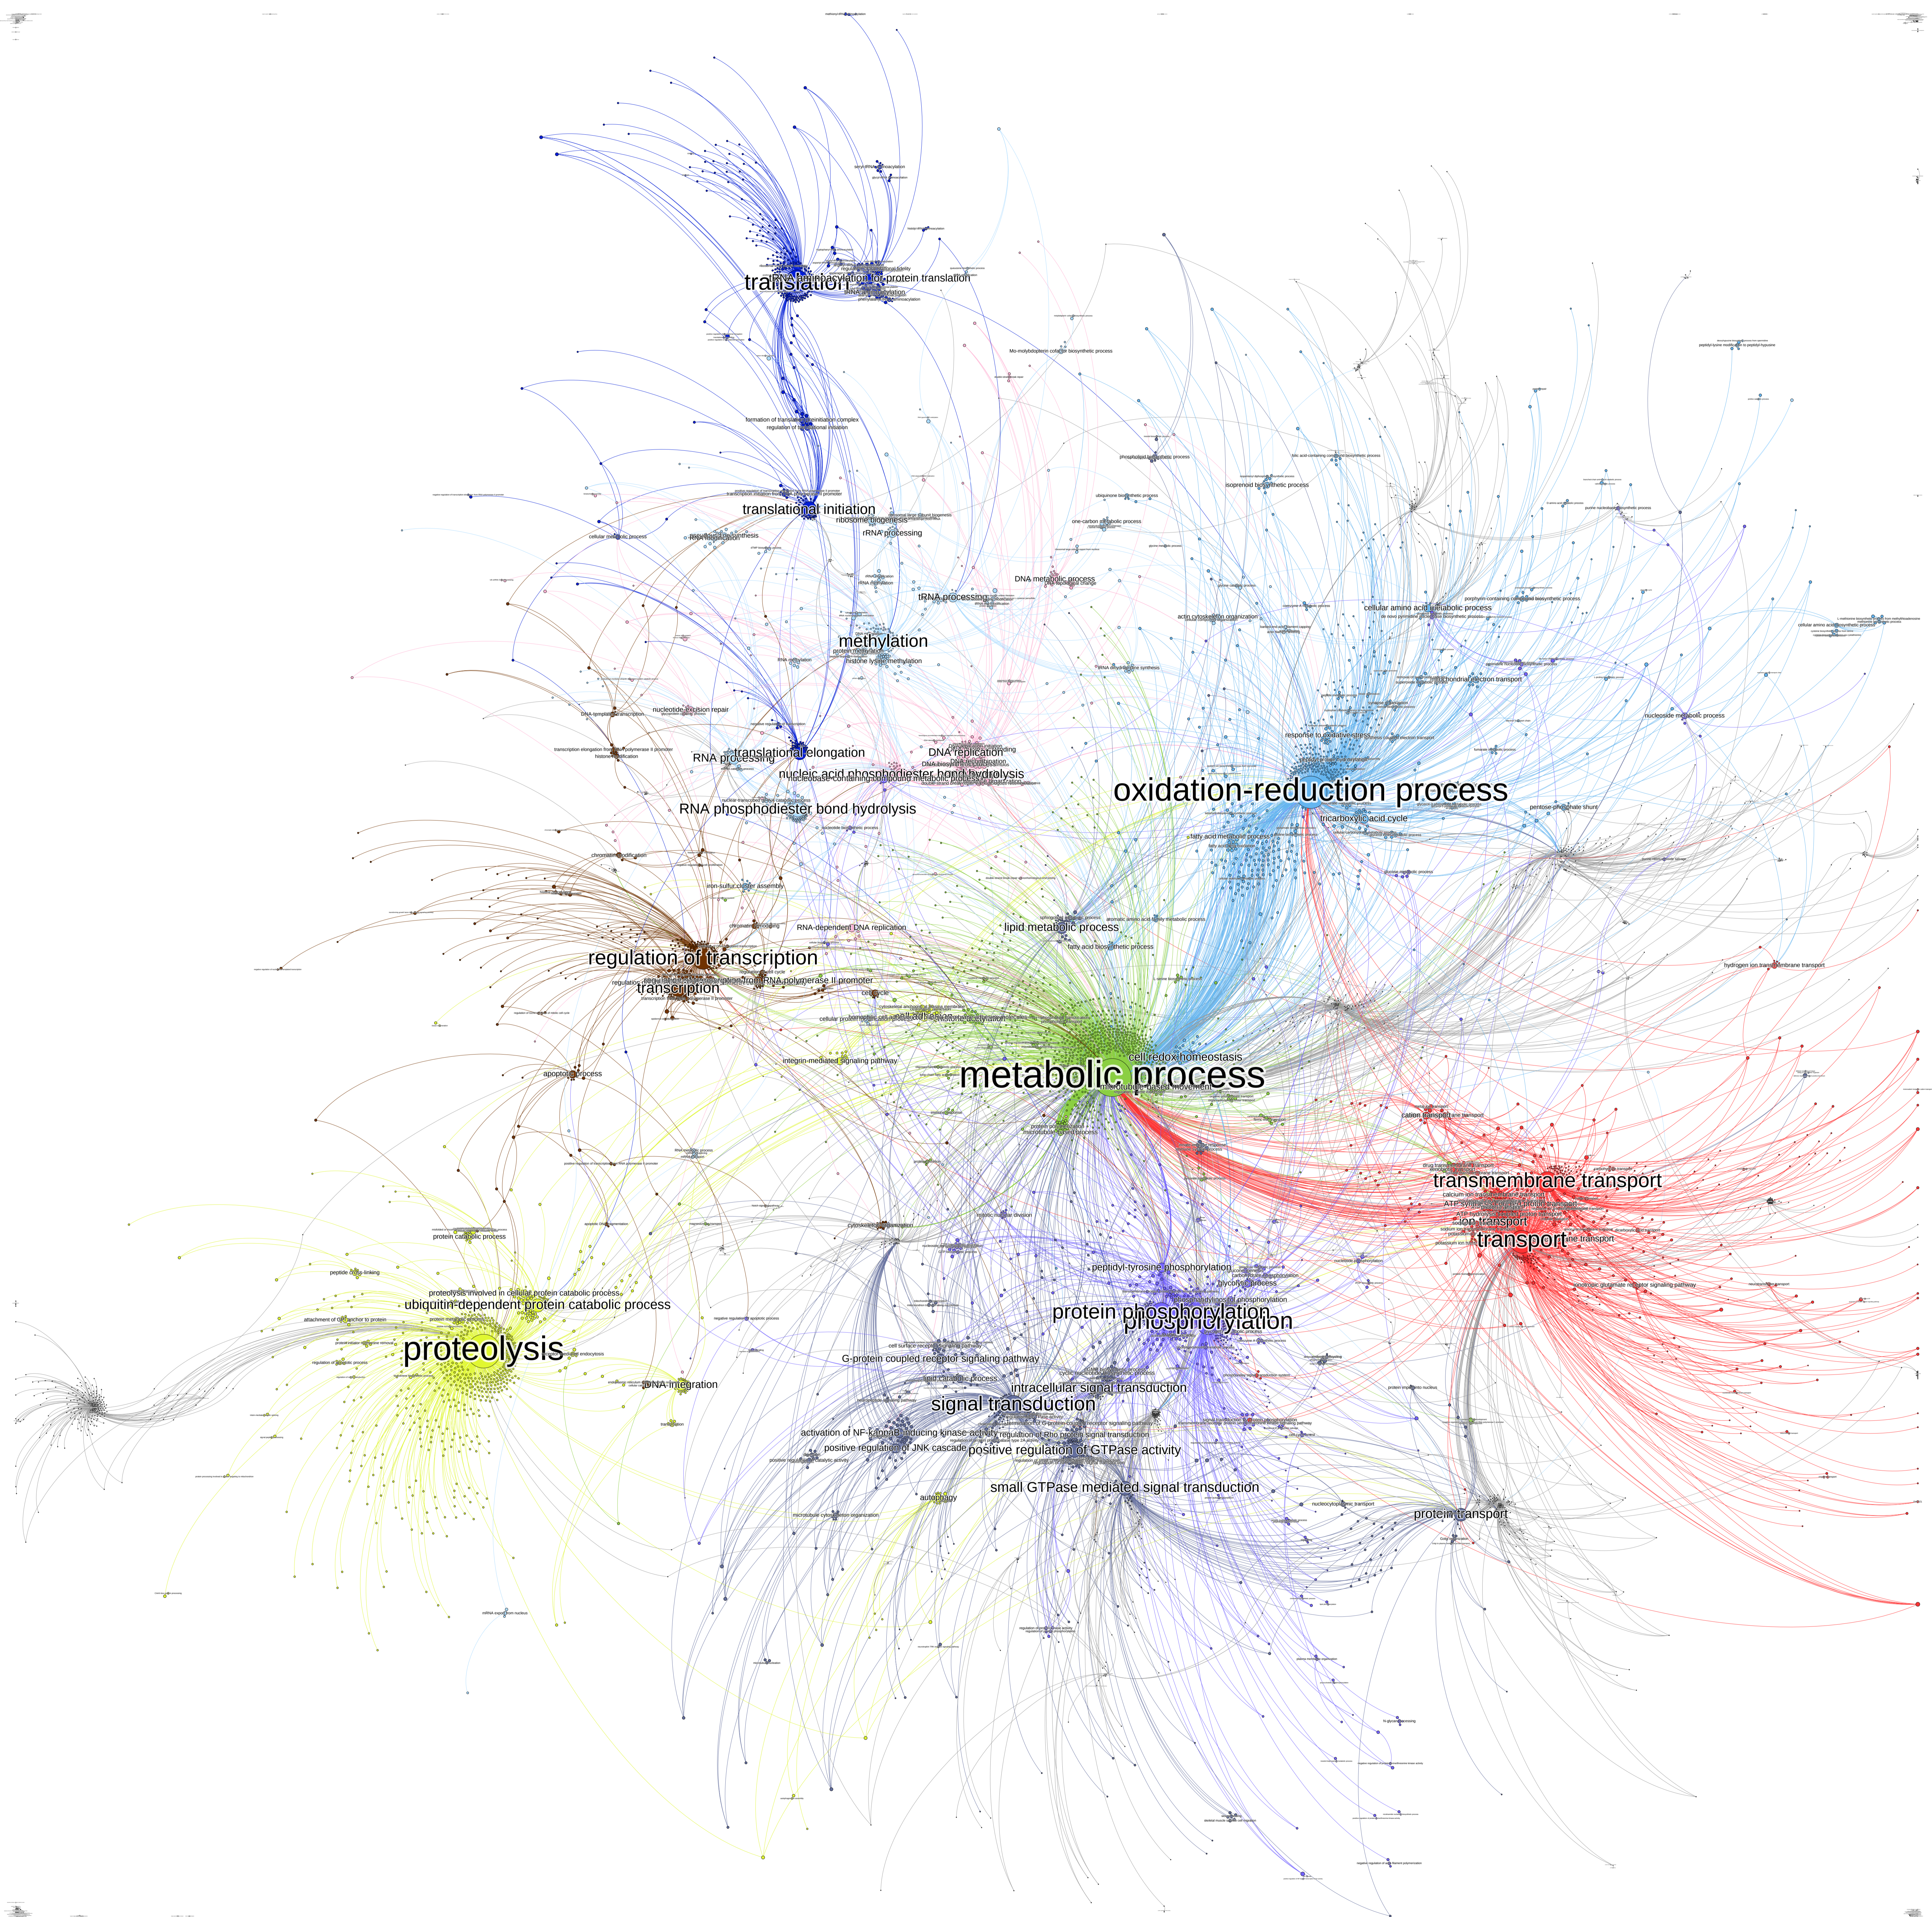

**Supplementary Figure 2. The network of proteins and processes in ITC.**

Only processes have been labeled to improve readability. The width of the links in proteins and processes is proportional to the representation of the protein. Colors denote clusters, or groups of nodes that interact more frequently between them than with others. The size of each node is proportional to its BNC.
